# Supplementary material for: Mimicking natural polymorphism in eIF4E by CRISPR‐Cas9 base editing is associated with resistance to potyviruses
Source: PubMed Central journal article supplement (PMC6686125; doi:10.1111/pbi.13096), 2019-03-05
Supplement: PBI-17-1736-s009.pdf [file PBI-17-1736-s009.pdf]

| Base at<br>+ 1447 position | T2 plants | T3 plants |
|----------------------------|-----------|-----------|
| C (unchanged)              | 2         | 4         |
| G                          | 1         | -         |
| C, G                       | 1         | 1         |
| C, T                       | -         | 1         |
| G, T                       | -         | 2         |
| > 2 bases                  | 9         | 8         |
| Indels                     | 2         | -         |

**Table S1.** Base changes resulting from the genome editing of the Cytosine 1447 of *eIF4E1* in T2 and T3 plants obtained from T1 plants harboring the pDICAID\_nCas9-PmCDA\_NptII\_eIF4E1 construct. Base status was characterized locus based on the chromatograms following Sanger sequencing of the *eIF4E1*.
